# Supplementary material
Source: publisher figshare collection journal article supplement (https://acs.figshare.com/ndownloader/files/4399321)
Supplement: Supplementary file 1 [file 4399321]

 
data_md130x
_publ_requested_journal          Organometallics
_publ_contact_author_name        'Ross A. Widenhoefer'
_publ_contact_author_address     
;Chemistry Department
Duke University
124 Science Drive
Box 90354
Durham, NC 27708
;
_publ_contact_author_email       ross.widenhoefer@duke.edu
_publ_contact_author_phone       919-660-1533
_publ_contact_author_fax         919-660-1605
loop_
_publ_author_name
_publ_author_address
'Brown, Timothy, J.'
;Chemistry Department
Duke University
124 Science Drive
Box 90354
Durham, NC 27708
;
'Sugie, Atsushi'
;Chemistry Department
Duke University
124 Science Drive
Box 90354
Durham, NC 27708
;
'Dickens, Marina'
;Chemistry Department
Duke University
124 Science Drive
Box 90354
Durham, NC 27708
;
'Widenhoefer, Ross, A.'
;Chemistry Department
Duke University
124 Science Drive
Box 90354
Durham, NC 27708
;

_audit_creation_method           SHELXL-97
_chemical_name_systematic        
; 
 ? 
;
_chemical_name_common            Allene1
_chemical_melting_point          ?
_chemical_formula_moiety         '2(C25 H35 Au P), 2(F6 Sb), C H2 Cl2)'
_chemical_formula_sum            'C51 H72 Au2 Cl2 F12 P2 Sb2'
_chemical_formula_weight         1683.39

loop_
_atom_type_symbol
_atom_type_description
_atom_type_scat_dispersion_real
_atom_type_scat_dispersion_imag
_atom_type_scat_source
C C 0.0033 0.0016 'International Tables Vol C Tables 4.2.6.8 and 6.1.1.4'
H H 0.0000 0.0000 'International Tables Vol C Tables 4.2.6.8 and 6.1.1.4'
F F 0.0171 0.0103 'International Tables Vol C Tables 4.2.6.8 and 6.1.1.4'
P P 0.1023 0.0942 'International Tables Vol C Tables 4.2.6.8 and 6.1.1.4'
Sb Sb -0.5866 1.5461 'International Tables Vol C Tables 4.2.6.8 and 6.1.1.4'
Au Au -2.0133 8.8022 'International Tables Vol C Tables 4.2.6.8 and 6.1.1.4'
Cl Cl 0.1484 0.1585 'International Tables Vol C Tables 4.2.6.8 and 6.1.1.4'

_symmetry_cell_setting           Triclinic
_symmetry_space_group_name_H-M   'P-1   '
_symmetry_space_group_name_Hall  '-P 1'

loop_
_symmetry_equiv_pos_as_xyz
'x, y, z'
'-x, -y, -z'

_cell_length_a                   7.8865(11)
_cell_length_b                   11.4932(16)
_cell_length_c                   16.466(2)
_cell_angle_alpha                98.452(8)
_cell_angle_beta                 94.196(8)
_cell_angle_gamma                96.769(8)
_cell_volume                     1459.8(3)
_cell_formula_units_Z            1
_cell_measurement_temperature    173(2)
_cell_measurement_reflns_used    8140
_cell_measurement_theta_min      2.98
_cell_measurement_theta_max      26.46

_exptl_crystal_description       hexagonal
_exptl_crystal_colour            colourless
_exptl_crystal_size_max          0.16
_exptl_crystal_size_mid          0.13
_exptl_crystal_size_min          0.10
_exptl_crystal_density_meas      ?
_exptl_crystal_density_diffrn    1.915
_exptl_crystal_density_method    'not measured'
_exptl_crystal_F_000             810
_exptl_absorpt_coefficient_mu    6.142
_exptl_absorpt_correction_type   Multi-scan
_exptl_absorpt_correction_T_min  0.4398
_exptl_absorpt_correction_T_max  0.5787
_exptl_absorpt_process_details   'SADABS 2.10 (Sheldrick, 2004)'

_exptl_special_details           
; 
 ? 
;

_diffrn_ambient_temperature      173(2)
_diffrn_radiation_wavelength     0.71073
_diffrn_radiation_type           MoK\a
_diffrn_radiation_source         'fine-focus sealed tube'
_diffrn_radiation_monochromator  graphite
_diffrn_measurement_device_type  'Bruker SMART Apex II'
_diffrn_measurement_method       \w
_diffrn_detector_area_resol_mean 8.3
_diffrn_reflns_number            20096
_diffrn_reflns_av_R_equivalents  0.0342
_diffrn_reflns_av_sigmaI/netI    0.0321
_diffrn_reflns_limit_h_min       -9
_diffrn_reflns_limit_h_max       9
_diffrn_reflns_limit_k_min       -13
_diffrn_reflns_limit_k_max       14
_diffrn_reflns_limit_l_min       -20
_diffrn_reflns_limit_l_max       20
_diffrn_reflns_theta_min         3.25
_diffrn_reflns_theta_max         26.46
_reflns_number_total             5510
_reflns_number_gt                4741
_reflns_threshold_expression     I>2\s(I)

_computing_data_collection       'Apex II 2.0 Rev.2 (Bruker, 2005)'
_computing_cell_refinement       SAINT
_computing_data_reduction        'SAINT 7.12A (Bruker, 2004)'
_computing_structure_solution    'SHELXS-97 (Sheldrick, 2008)'
_computing_structure_refinement  'SHELXL-97 (Sheldrick, 2008)'
_computing_molecular_graphics    'SHELXTL 5.1, XP (Sheldrick, 1994)'
_computing_publication_material  'SHELXS-97 (Sheldrick, 1990)'

_refine_special_details          
; 
 Refinement of F^2^ against ALL reflections.  The weighted R-factor wR and 
 goodness of fit S are based on F^2^, conventional R-factors R are based 
 on F, with F set to zero for negative F^2^. The threshold expression of 
 F^2^ > 2sigma(F^2^) is used only for calculating R-factors(gt) etc. and is 
 not relevant to the choice of reflections for refinement.  R-factors based 
 on F^2^ are statistically about twice as large as those based on F, and R- 
 factors based on ALL data will be even larger. 
 
 The short carbon bond length is due to the unusual chemistry involved with 
allenes. No action was taken.  Because two molecules exist in the unit cell, 
the center of  gravity does not fall in the cell for all residues and no action
 was taken to correct this.  Data were scaled by SADABS.  Despite low 
temperature collection, some disorder remained in the counterion residues.  
Efforts were taken to model major orientations, but not all minor orientations
 were included. 
;

_refine_ls_structure_factor_coef Fsqd
_refine_ls_matrix_type           full
_refine_ls_weighting_scheme      calc
_refine_ls_weighting_details     
'calc w=1/[\s^2^(Fo^2^)+(0.0360P)^2^+0.0000P] where P=(Fo^2^+2Fc^2^)/3'
_atom_sites_solution_primary     direct
_atom_sites_solution_secondary   difmap
_atom_sites_solution_hydrogens   geom
_refine_ls_hydrogen_treatment    constr
_refine_ls_extinction_method     none
_refine_ls_extinction_coef       ?
_refine_ls_number_reflns         5510
_refine_ls_number_parameters     328
_refine_ls_number_restraints     0
_refine_ls_R_factor_all          0.0440
_refine_ls_R_factor_gt           0.0324
_refine_ls_wR_factor_ref         0.0770
_refine_ls_wR_factor_gt          0.0722
_refine_ls_goodness_of_fit_ref   1.287
_refine_ls_restrained_S_all      1.287
_refine_ls_shift/su_max          0.144
_refine_ls_shift/su_mean         0.006

loop_
_atom_site_label
_atom_site_type_symbol
_atom_site_fract_x
_atom_site_fract_y
_atom_site_fract_z
_atom_site_U_iso_or_equiv
_atom_site_adp_type
_atom_site_occupancy
_atom_site_symmetry_multiplicity
_atom_site_calc_flag
_atom_site_refinement_flags
_atom_site_disorder_assembly
_atom_site_disorder_group
Sb1 Sb -0.94176(5) 1.21283(4) 0.23096(2) 0.03278(11) Uani 1 1 d . . .
F1 F -0.9365(6) 1.3630(4) 0.2918(3) 0.0744(14) Uani 1 1 d . . .
F2 F -1.1799(5) 1.1888(4) 0.2263(3) 0.0666(12) Uani 1 1 d . . .
F3 F -0.9482(6) 1.0636(4) 0.1690(3) 0.0661(12) Uani 1 1 d . . .
F4 F -0.9241(5) 1.1461(4) 0.3273(2) 0.0649(12) Uani 1 1 d . . .
F5 F -0.7043(5) 1.2350(4) 0.2341(4) 0.0823(16) Uani 1 1 d . . .
F6 F -0.9586(7) 1.2802(5) 0.1343(3) 0.0843(15) Uani 1 1 d . . .
Au1 Au -1.42714(3) 0.838313(19) 0.198206(12) 0.02446(8) Uani 1 1 d . . .
P1 P -1.28322(16) 0.68033(12) 0.21988(7) 0.0212(3) Uani 1 1 d . . .
C1 C -1.5520(7) 0.9967(5) 0.1882(3) 0.0295(13) Uani 1 1 d . . .
H1A H -1.6503 1.0063 0.2216 0.035 Uiso 1 1 calc R . .
H1B H -1.4739 1.0716 0.1912 0.035 Uiso 1 1 calc R . .
C2 C -1.5899(7) 0.9328(5) 0.1128(3) 0.0287(13) Uani 1 1 d . . .
C3 C -1.6522(7) 0.8921(5) 0.0366(3) 0.0306(13) Uani 1 1 d . . .
C4 C -1.6199(8) 0.7787(6) -0.0132(4) 0.0436(17) Uani 1 1 d . . .
H4A H -1.5378 0.7412 0.0185 0.065 Uiso 1 1 calc R . .
H4B H -1.5729 0.7954 -0.0644 0.065 Uiso 1 1 calc R . .
H4C H -1.7279 0.7253 -0.0264 0.065 Uiso 1 1 calc R . .
C5 C -1.7707(7) 0.9657(6) -0.0030(3) 0.0374(14) Uani 1 1 d . . .
H5A H -1.7790 1.0382 0.0353 0.056 Uiso 1 1 calc R . .
H5B H -1.8848 0.9199 -0.0167 0.056 Uiso 1 1 calc R . .
H5C H -1.7254 0.9869 -0.0535 0.056 Uiso 1 1 calc R . .
C6 C -1.1025(7) 0.6795(5) 0.1512(3) 0.0277(12) Uani 1 1 d . . .
C7 C -1.0317(8) 0.5617(6) 0.1308(4) 0.0396(15) Uani 1 1 d . . .
H7A H -0.9394 0.5711 0.0945 0.059 Uiso 1 1 calc R . .
H7B H -1.1236 0.5011 0.1028 0.059 Uiso 1 1 calc R . .
H7C H -0.9866 0.5373 0.1818 0.059 Uiso 1 1 calc R . .
C8 C -0.9605(8) 0.7746(6) 0.1924(4) 0.0426(15) Uani 1 1 d . . .
H8A H -0.8637 0.7766 0.1583 0.064 Uiso 1 1 calc R . .
H8B H -0.9228 0.7568 0.2467 0.064 Uiso 1 1 calc R . .
H8C H -1.0031 0.8518 0.1987 0.064 Uiso 1 1 calc R . .
C9 C -1.1676(8) 0.7149(6) 0.0681(3) 0.0432(17) Uani 1 1 d . . .
H9A H -1.0756 0.7145 0.0312 0.065 Uiso 1 1 calc R . .
H9B H -1.2021 0.7946 0.0782 0.065 Uiso 1 1 calc R . .
H9C H -1.2661 0.6580 0.0425 0.065 Uiso 1 1 calc R . .
C10 C -1.4371(6) 0.5400(5) 0.2045(3) 0.0266(12) Uani 1 1 d . . .
C11 C -1.5773(7) 0.5643(6) 0.2634(4) 0.0367(14) Uani 1 1 d . . .
H11A H -1.6618 0.4934 0.2584 0.055 Uiso 1 1 calc R . .
H11B H -1.6344 0.6307 0.2487 0.055 Uiso 1 1 calc R . .
H11C H -1.5247 0.5844 0.3203 0.055 Uiso 1 1 calc R . .
C12 C -1.5195(8) 0.5149(6) 0.1159(3) 0.0400(15) Uani 1 1 d . . .
H12A H -1.5999 0.4415 0.1080 0.060 Uiso 1 1 calc R . .
H12B H -1.4302 0.5063 0.0779 0.060 Uiso 1 1 calc R . .
H12C H -1.5813 0.5809 0.1049 0.060 Uiso 1 1 calc R . .
C13 C -1.3588(8) 0.4312(6) 0.2254(4) 0.0383(14) Uani 1 1 d . . .
H13A H -1.4476 0.3621 0.2162 0.057 Uiso 1 1 calc R . .
H13B H -1.3122 0.4459 0.2834 0.057 Uiso 1 1 calc R . .
H13C H -1.2666 0.4157 0.1901 0.057 Uiso 1 1 calc R . .
C14 C -1.1864(6) 0.6961(5) 0.3258(3) 0.0243(11) Uani 1 1 d . . .
C15 C -1.2160(7) 0.7860(5) 0.3886(3) 0.0286(12) Uani 1 1 d . . .
C16 C -1.1270(9) 0.7938(7) 0.4663(4) 0.0509(19) Uani 1 1 d . . .
H16A H -1.1448 0.8552 0.5089 0.061 Uiso 1 1 calc R . .
C17 C -1.0146(9) 0.7159(7) 0.4829(4) 0.058(2) Uani 1 1 d . . .
H17A H -0.9572 0.7234 0.5366 0.070 Uiso 1 1 calc R . .
C18 C -0.9846(8) 0.6260(7) 0.4215(4) 0.0480(18) Uani 1 1 d . . .
H18A H -0.9060 0.5723 0.4322 0.058 Uiso 1 1 calc R . .
C19 C -1.0725(7) 0.6164(5) 0.3438(3) 0.0322(13) Uani 1 1 d . . .
H19A H -1.0548 0.5541 0.3018 0.039 Uiso 1 1 calc R . .
C20 C -1.3377(7) 0.8748(5) 0.3814(3) 0.0284(13) Uani 1 1 d . . .
C21 C -1.5100(7) 0.8509(6) 0.3934(3) 0.0359(14) Uani 1 1 d . . .
H21A H -1.5576 0.7728 0.3986 0.043 Uiso 1 1 calc R . .
C22 C -1.6127(8) 0.9414(6) 0.3980(3) 0.0399(16) Uani 1 1 d . . .
H22A H -1.7304 0.9241 0.4063 0.048 Uiso 1 1 calc R . .
C23 C -1.5474(9) 1.0566(6) 0.3908(3) 0.0426(17) Uani 1 1 d . . .
H23A H -1.6189 1.1178 0.3943 0.051 Uiso 1 1 calc R . .
C24 C -1.3783(9) 1.0802(6) 0.3787(3) 0.0462(17) Uani 1 1 d . . .
H24A H -1.3330 1.1590 0.3741 0.055 Uiso 1 1 calc R . .
C25 C -1.2704(8) 0.9929(6) 0.3728(3) 0.0374(15) Uani 1 1 d . . .
H25A H -1.1537 1.0113 0.3632 0.045 Uiso 1 1 calc R . .
Cl1 Cl -0.4243(4) 0.3987(3) 0.46387(17) 0.1008(9) Uani 1 1 d . . .
C1X C -0.599(4) 0.439(3) 0.480(2) 0.108(10) Uani 0.50 1 d P . .
H1X H -0.612(14) 0.466(10) 0.467(6) 0.050 Uiso 1 1 d . . .

loop_
_atom_site_aniso_label
_atom_site_aniso_U_11
_atom_site_aniso_U_22
_atom_site_aniso_U_33
_atom_site_aniso_U_23
_atom_site_aniso_U_13
_atom_site_aniso_U_12
Sb1 0.0304(2) 0.0219(2) 0.0489(2) 0.01125(17) 0.00738(16) 0.00576(17)
F1 0.076(3) 0.040(3) 0.100(3) -0.016(2) 0.004(3) 0.019(2)
F2 0.034(2) 0.065(3) 0.104(3) 0.026(2) -0.002(2) 0.005(2)
F3 0.084(3) 0.037(3) 0.075(3) -0.002(2) -0.001(2) 0.016(2)
F4 0.062(3) 0.075(4) 0.058(2) 0.032(2) -0.0100(19) -0.008(2)
F5 0.035(2) 0.044(3) 0.174(5) 0.029(3) 0.030(3) 0.004(2)
F6 0.123(4) 0.064(4) 0.078(3) 0.046(3) 0.017(3) 0.015(3)
Au1 0.02444(11) 0.02019(13) 0.03068(11) 0.00703(8) 0.00227(7) 0.00715(8)
P1 0.0199(6) 0.0185(8) 0.0261(6) 0.0054(5) 0.0009(5) 0.0044(6)
C1 0.038(3) 0.018(3) 0.035(3) 0.004(2) 0.004(2) 0.015(3)
C2 0.026(3) 0.031(4) 0.035(3) 0.014(2) 0.004(2) 0.016(3)
C3 0.025(3) 0.032(4) 0.036(3) 0.011(2) 0.002(2) 0.002(3)
C4 0.051(4) 0.036(4) 0.042(3) -0.004(3) -0.007(3) 0.018(3)
C5 0.026(3) 0.046(4) 0.043(3) 0.016(3) -0.004(2) 0.008(3)
C6 0.026(3) 0.026(3) 0.035(3) 0.010(2) 0.011(2) 0.008(2)
C7 0.034(3) 0.042(4) 0.047(3) 0.010(3) 0.015(3) 0.013(3)
C8 0.037(3) 0.034(4) 0.058(4) 0.011(3) 0.017(3) -0.001(3)
C9 0.053(4) 0.050(5) 0.038(3) 0.022(3) 0.020(3) 0.024(3)
C10 0.021(3) 0.019(3) 0.039(3) 0.004(2) -0.002(2) 0.001(2)
C11 0.025(3) 0.026(4) 0.057(4) 0.007(3) 0.006(3) -0.007(3)
C12 0.036(3) 0.041(4) 0.039(3) 0.000(3) -0.008(2) 0.005(3)
C13 0.037(3) 0.022(4) 0.054(4) 0.004(3) -0.001(3) 0.003(3)
C14 0.017(2) 0.028(3) 0.028(3) 0.008(2) -0.0005(19) -0.002(2)
C15 0.024(3) 0.027(4) 0.035(3) 0.008(2) 0.000(2) -0.001(2)
C16 0.056(4) 0.060(5) 0.034(3) -0.006(3) -0.011(3) 0.022(4)
C17 0.063(5) 0.073(6) 0.038(3) 0.001(3) -0.020(3) 0.027(4)
C18 0.042(4) 0.063(5) 0.043(3) 0.017(3) -0.007(3) 0.020(4)
C19 0.030(3) 0.025(4) 0.040(3) 0.004(2) -0.004(2) 0.003(3)
C20 0.028(3) 0.032(4) 0.025(2) 0.001(2) 0.001(2) 0.009(3)
C21 0.030(3) 0.045(4) 0.030(3) 0.000(3) 0.002(2) -0.001(3)
C22 0.033(3) 0.053(5) 0.034(3) 0.003(3) 0.006(2) 0.016(3)
C23 0.056(4) 0.044(5) 0.029(3) 0.000(3) 0.004(3) 0.022(4)
C24 0.064(5) 0.038(4) 0.036(3) 0.003(3) 0.002(3) 0.009(4)
C25 0.036(3) 0.040(4) 0.036(3) 0.004(3) 0.005(2) 0.008(3)
Cl1 0.1009(19) 0.095(2) 0.1066(19) 0.0096(15) -0.0154(15) 0.0370(17)
C1X 0.087(15) 0.08(2) 0.15(2) 0.059(14) -0.053(14) -0.016(14)

_geom_special_details            
; 
 All esds (except the esd in the dihedral angle between two l.s. planes) 
 are estimated using the full covariance matrix.  The cell esds are taken 
 into account individually in the estimation of esds in distances, angles 
 and torsion angles; correlations between esds in cell parameters are only 
 used when they are defined by crystal symmetry.  An approximate (isotropic) 
 treatment of cell esds is used for estimating esds involving l.s. planes. 
;

loop_
_geom_bond_atom_site_label_1
_geom_bond_atom_site_label_2
_geom_bond_distance
_geom_bond_site_symmetry_2
_geom_bond_publ_flag
Sb1 F5 1.856(4) . ?
Sb1 F3 1.856(4) . ?
Sb1 F2 1.860(4) . ?
Sb1 F1 1.858(4) . ?
Sb1 F4 1.865(4) . ?
Sb1 F6 1.872(4) . ?
Au1 C1 2.191(5) . ?
Au1 C2 2.306(5) . ?
Au1 P1 2.3086(13) . ?
P1 C14 1.827(5) . ?
P1 C10 1.874(6) . ?
P1 C6 1.883(5) . ?
C1 C2 1.340(7) . ?
C1 H1A 0.9900 . ?
C1 H1B 0.9900 . ?
C2 C3 1.311(7) . ?
C3 C4 1.493(8) . ?
C3 C5 1.509(7) . ?
C4 H4A 0.9800 . ?
C4 H4B 0.9800 . ?
C4 H4C 0.9800 . ?
C5 H5A 0.9800 . ?
C5 H5B 0.9800 . ?
C5 H5C 0.9800 . ?
C6 C8 1.513(9) . ?
C6 C7 1.526(8) . ?
C6 C9 1.553(7) . ?
C7 H7A 0.9800 . ?
C7 H7B 0.9800 . ?
C7 H7C 0.9800 . ?
C8 H8A 0.9800 . ?
C8 H8B 0.9800 . ?
C8 H8C 0.9800 . ?
C9 H9A 0.9800 . ?
C9 H9B 0.9800 . ?
C9 H9C 0.9800 . ?
C10 C12 1.525(7) . ?
C10 C13 1.530(7) . ?
C10 C11 1.547(7) . ?
C11 H11A 0.9800 . ?
C11 H11B 0.9800 . ?
C11 H11C 0.9800 . ?
C12 H12A 0.9800 . ?
C12 H12B 0.9800 . ?
C12 H12C 0.9800 . ?
C13 H13A 0.9800 . ?
C13 H13B 0.9800 . ?
C13 H13C 0.9800 . ?
C14 C15 1.404(7) . ?
C14 C19 1.403(7) . ?
C15 C16 1.398(7) . ?
C15 C20 1.493(7) . ?
C16 C17 1.374(9) . ?
C16 H16A 0.9500 . ?
C17 C18 1.390(9) . ?
C17 H17A 0.9500 . ?
C18 C19 1.393(7) . ?
C18 H18A 0.9500 . ?
C19 H19A 0.9500 . ?
C20 C21 1.389(8) . ?
C20 C25 1.428(9) . ?
C21 C22 1.388(8) . ?
C21 H21A 0.9500 . ?
C22 C23 1.388(10) . ?
C22 H22A 0.9500 . ?
C23 C24 1.364(10) . ?
C23 H23A 0.9500 . ?
C24 C25 1.388(8) . ?
C24 H24A 0.9500 . ?
C25 H25A 0.9500 . ?
Cl1 C1X 1.54(4) . ?
Cl1 C1X 1.93(4) 2_466 ?
C1X Cl1 1.93(4) 2_466 ?
C1X C1X 1.97(7) 2_466 ?
C1X H1X 0.41(10) . ?

loop_
_geom_angle_atom_site_label_1
_geom_angle_atom_site_label_2
_geom_angle_atom_site_label_3
_geom_angle
_geom_angle_site_symmetry_1
_geom_angle_site_symmetry_3
_geom_angle_publ_flag
F5 Sb1 F3 90.2(2) . . ?
F5 Sb1 F2 179.1(2) . . ?
F3 Sb1 F2 88.9(2) . . ?
F5 Sb1 F1 90.0(2) . . ?
F3 Sb1 F1 179.2(2) . . ?
F2 Sb1 F1 90.8(2) . . ?
F5 Sb1 F4 89.3(2) . . ?
F3 Sb1 F4 89.8(2) . . ?
F2 Sb1 F4 91.00(19) . . ?
F1 Sb1 F4 91.0(2) . . ?
F5 Sb1 F6 90.5(2) . . ?
F3 Sb1 F6 90.3(2) . . ?
F2 Sb1 F6 89.2(2) . . ?
F1 Sb1 F6 88.9(2) . . ?
F4 Sb1 F6 179.8(2) . . ?
C1 Au1 C2 34.55(19) . . ?
C1 Au1 P1 174.84(14) . . ?
C2 Au1 P1 150.49(14) . . ?
C14 P1 C10 105.2(2) . . ?
C14 P1 C6 106.9(2) . . ?
C10 P1 C6 115.2(2) . . ?
C14 P1 Au1 112.16(18) . . ?
C10 P1 Au1 110.10(16) . . ?
C6 P1 Au1 107.31(17) . . ?
C2 C1 Au1 77.4(3) . . ?
C2 C1 H1A 115.6 . . ?
Au1 C1 H1A 115.6 . . ?
C2 C1 H1B 115.6 . . ?
Au1 C1 H1B 115.6 . . ?
H1A C1 H1B 112.6 . . ?
C3 C2 C1 165.0(5) . . ?
C3 C2 Au1 126.9(4) . . ?
C1 C2 Au1 68.0(3) . . ?
C2 C3 C4 126.0(5) . . ?
C2 C3 C5 116.5(5) . . ?
C4 C3 C5 117.5(5) . . ?
C3 C4 H4A 109.5 . . ?
C3 C4 H4B 109.5 . . ?
H4A C4 H4B 109.5 . . ?
C3 C4 H4C 109.5 . . ?
H4A C4 H4C 109.5 . . ?
H4B C4 H4C 109.5 . . ?
C3 C5 H5A 109.5 . . ?
C3 C5 H5B 109.5 . . ?
H5A C5 H5B 109.5 . . ?
C3 C5 H5C 109.5 . . ?
H5A C5 H5C 109.5 . . ?
H5B C5 H5C 109.5 . . ?
C8 C6 C7 109.9(5) . . ?
C8 C6 C9 108.0(5) . . ?
C7 C6 C9 107.0(4) . . ?
C8 C6 P1 107.2(4) . . ?
C7 C6 P1 116.3(4) . . ?
C9 C6 P1 108.1(3) . . ?
C6 C7 H7A 109.5 . . ?
C6 C7 H7B 109.5 . . ?
H7A C7 H7B 109.5 . . ?
C6 C7 H7C 109.5 . . ?
H7A C7 H7C 109.5 . . ?
H7B C7 H7C 109.5 . . ?
C6 C8 H8A 109.5 . . ?
C6 C8 H8B 109.5 . . ?
H8A C8 H8B 109.5 . . ?
C6 C8 H8C 109.5 . . ?
H8A C8 H8C 109.5 . . ?
H8B C8 H8C 109.5 . . ?
C6 C9 H9A 109.5 . . ?
C6 C9 H9B 109.5 . . ?
H9A C9 H9B 109.5 . . ?
C6 C9 H9C 109.5 . . ?
H9A C9 H9C 109.5 . . ?
H9B C9 H9C 109.5 . . ?
C12 C10 C13 109.8(5) . . ?
C12 C10 C11 108.9(4) . . ?
C13 C10 C11 108.1(5) . . ?
C12 C10 P1 109.6(4) . . ?
C13 C10 P1 114.7(4) . . ?
C11 C10 P1 105.6(4) . . ?
C10 C11 H11A 109.5 . . ?
C10 C11 H11B 109.5 . . ?
H11A C11 H11B 109.5 . . ?
C10 C11 H11C 109.5 . . ?
H11A C11 H11C 109.5 . . ?
H11B C11 H11C 109.5 . . ?
C10 C12 H12A 109.5 . . ?
C10 C12 H12B 109.5 . . ?
H12A C12 H12B 109.5 . . ?
C10 C12 H12C 109.5 . . ?
H12A C12 H12C 109.5 . . ?
H12B C12 H12C 109.5 . . ?
C10 C13 H13A 109.5 . . ?
C10 C13 H13B 109.5 . . ?
H13A C13 H13B 109.5 . . ?
C10 C13 H13C 109.5 . . ?
H13A C13 H13C 109.5 . . ?
H13B C13 H13C 109.5 . . ?
C15 C14 C19 119.0(4) . . ?
C15 C14 P1 123.2(4) . . ?
C19 C14 P1 117.8(4) . . ?
C16 C15 C14 118.3(5) . . ?
C16 C15 C20 115.6(5) . . ?
C14 C15 C20 126.1(4) . . ?
C17 C16 C15 122.2(6) . . ?
C17 C16 H16A 118.9 . . ?
C15 C16 H16A 118.9 . . ?
C16 C17 C18 120.2(5) . . ?
C16 C17 H17A 119.9 . . ?
C18 C17 H17A 119.9 . . ?
C17 C18 C19 118.5(6) . . ?
C17 C18 H18A 120.8 . . ?
C19 C18 H18A 120.8 . . ?
C18 C19 C14 121.9(5) . . ?
C18 C19 H19A 119.1 . . ?
C14 C19 H19A 119.1 . . ?
C21 C20 C25 118.8(5) . . ?
C21 C20 C15 122.0(6) . . ?
C25 C20 C15 118.7(5) . . ?
C22 C21 C20 119.9(7) . . ?
C22 C21 H21A 120.0 . . ?
C20 C21 H21A 120.0 . . ?
C21 C22 C23 121.5(6) . . ?
C21 C22 H22A 119.3 . . ?
C23 C22 H22A 119.2 . . ?
C24 C23 C22 118.7(6) . . ?
C24 C23 H23A 120.7 . . ?
C22 C23 H23A 120.7 . . ?
C23 C24 C25 122.2(7) . . ?
C23 C24 H24A 118.9 . . ?
C25 C24 H24A 118.9 . . ?
C24 C25 C20 118.9(6) . . ?
C24 C25 H25A 120.5 . . ?
C20 C25 H25A 120.5 . . ?
C1X Cl1 C1X 68.2(19) . 2_466 ?
Cl1 C1X Cl1 111.8(19) . 2_466 ?
Cl1 C1X C1X 65.5(19) . 2_466 ?
Cl1 C1X C1X 46.3(17) 2_466 2_466 ?
Cl1 C1X H1X 114(10) . . ?
Cl1 C1X H1X 61(10) 2_466 . ?
C1X C1X H1X 81(10) 2_466 . ?

loop_
_geom_torsion_atom_site_label_1
_geom_torsion_atom_site_label_2
_geom_torsion_atom_site_label_3
_geom_torsion_atom_site_label_4
_geom_torsion
_geom_torsion_site_symmetry_1
_geom_torsion_site_symmetry_2
_geom_torsion_site_symmetry_3
_geom_torsion_site_symmetry_4
_geom_torsion_publ_flag
C2 Au1 P1 C14 -179.3(3) . . . . ?
C2 Au1 P1 C10 -62.5(4) . . . . ?
C2 Au1 P1 C6 63.6(4) . . . . ?
Au1 C1 C2 C3 173(2) . . . . ?
C1 Au1 C2 C3 -177.6(8) . . . . ?
P1 Au1 C2 C3 4.4(7) . . . . ?
P1 Au1 C2 C1 -177.9(3) . . . . ?
C1 C2 C3 C4 -176(2) . . . . ?
Au1 C2 C3 C4 -4.7(9) . . . . ?
C1 C2 C3 C5 2(3) . . . . ?
Au1 C2 C3 C5 173.6(4) . . . . ?
C14 P1 C6 C8 -42.2(4) . . . . ?
C10 P1 C6 C8 -158.7(4) . . . . ?
Au1 P1 C6 C8 78.3(4) . . . . ?
C14 P1 C6 C7 81.2(5) . . . . ?
C10 P1 C6 C7 -35.3(5) . . . . ?
Au1 P1 C6 C7 -158.3(4) . . . . ?
C14 P1 C6 C9 -158.5(4) . . . . ?
C10 P1 C6 C9 85.0(5) . . . . ?
Au1 P1 C6 C9 -37.9(4) . . . . ?
C14 P1 C10 C12 -177.3(4) . . . . ?
C6 P1 C10 C12 -59.8(4) . . . . ?
Au1 P1 C10 C12 61.7(4) . . . . ?
C14 P1 C10 C13 -53.3(4) . . . . ?
C6 P1 C10 C13 64.2(5) . . . . ?
Au1 P1 C10 C13 -174.4(3) . . . . ?
C14 P1 C10 C11 65.6(4) . . . . ?
C6 P1 C10 C11 -176.9(3) . . . . ?
Au1 P1 C10 C11 -55.5(4) . . . . ?
C10 P1 C14 C15 -111.9(5) . . . . ?
C6 P1 C14 C15 125.2(5) . . . . ?
Au1 P1 C14 C15 7.8(5) . . . . ?
C10 P1 C14 C19 70.4(5) . . . . ?
C6 P1 C14 C19 -52.5(5) . . . . ?
Au1 P1 C14 C19 -169.9(4) . . . . ?
C19 C14 C15 C16 1.5(9) . . . . ?
P1 C14 C15 C16 -176.2(5) . . . . ?
C19 C14 C15 C20 -177.4(6) . . . . ?
P1 C14 C15 C20 4.9(8) . . . . ?
C14 C15 C16 C17 -1.0(11) . . . . ?
C20 C15 C16 C17 178.0(7) . . . . ?
C15 C16 C17 C18 0.6(13) . . . . ?
C16 C17 C18 C19 -0.8(12) . . . . ?
C17 C18 C19 C14 1.4(10) . . . . ?
C15 C14 C19 C18 -1.8(9) . . . . ?
P1 C14 C19 C18 176.0(5) . . . . ?
C16 C15 C20 C21 -92.9(7) . . . . ?
C14 C15 C20 C21 86.0(7) . . . . ?
C16 C15 C20 C25 78.5(7) . . . . ?
C14 C15 C20 C25 -102.6(7) . . . . ?
C25 C20 C21 C22 -0.8(7) . . . . ?
C15 C20 C21 C22 170.6(5) . . . . ?
C20 C21 C22 C23 0.0(8) . . . . ?
C21 C22 C23 C24 0.2(8) . . . . ?
C22 C23 C24 C25 0.4(9) . . . . ?
C23 C24 C25 C20 -1.3(8) . . . . ?
C21 C20 C25 C24 1.5(7) . . . . ?
C15 C20 C25 C24 -170.2(5) . . . . ?
C1X Cl1 C1X Cl1 0.000(1) 2_466 . . 2_466 ?

_diffrn_measured_fraction_theta_max 0.912
_diffrn_reflns_theta_full        26.46
_diffrn_measured_fraction_theta_full 0.912
_refine_diff_density_max         1.412
_refine_diff_density_min         -1.149
_refine_diff_density_rms         0.136
